# Supplementary material for: Portable bioluminescent platform for in vivo monitoring of biological processes in non-transgenic animals
Source: PubMed Central journal article supplement (PMC8113525; doi:10.1038/s41467-021-22892-9), 2021-05-11
Supplement: 41467_2021_22892_MOESM2_ESM.pdf [file 41467_2021_22892_MOESM2_ESM.pdf]

**Title:** Supplementary Movie 1

**Description:** The scientific Movie 1 demonstrates how the PBL technology works and outlines some important biological applications.
